# Supplementary material for: Cognitive Change in Schizophrenia and Other Psychoses in the Decade Following the First Episode
Source: Atypon-hosted journal article supplement (doi:10.1176/appi.ajp.2019.18091088), 2019-07-01
Supplement: AJP_18091088_correction01.pdf [file AJP_18091088_correction01.pdf]

## **Correction to Zanelli et al.**

When the article “Cognitive Change in Schizophrenia and Other Psychoses in the Decade Following the First Episode,” by Jolanta Zanelli, Ph.D., et al. (doi: 10.1176/ appi.ajp.2019.18091088) was published online on July 1, 2019, and appeared in the October 2019 issue, there were two incorrect subgroup totals in the Case Subjects column of Figure 1. The number of individuals with incomplete or no neuropsychological testing was 145, and the number of individuals who completed neuropsychological testing but were excluded for other reasons was 58. These corrections were made and the article was reposted on November 13, 2019.
